# Supplementary material for: A combination of metformin and galantamine exhibits synergistic benefits in the treatment of sarcopenia
Source: PubMed Central journal article supplement (PMC10445681; doi:10.1172/jci.insight.168787), 2023-08-08
Supplement: jciinsight-8-168787-s099.pdf [file jciinsight-8-168787-s099.pdf]

## **A combination of metformin and galantamine exhibits synergistic benefits in the treatment of sarcopenia**

Caterina Tezze<sup>1,2</sup>, Francesco Ivan Amendolagine<sup>1,2</sup>, Leonardo Nogara<sup>1,2</sup>, Martina Baraldo<sup>1,2</sup>, Stefano Ciciliot<sup>1,2</sup>, Diletta Arcidiacono<sup>3</sup>, Alice Zaramella<sup>3</sup>, Giulio Masiero<sup>1,2</sup>, Giulia Ferrarese<sup>1,2</sup>, Stefano Realdon<sup>3</sup>, Bert Blaauw<sup>1,2</sup>, Giel Detienne<sup>4</sup>, Ann TJ Beliën<sup>4</sup>, Marco Sandri<sup>1,2,5</sup>, Evi M Mercken<sup>4</sup>.

<sup>1</sup>Department of Biomedical Sciences, University of Padova, via Ugo Bassi 58/b, 35121 Padova, Italy

<sup>2</sup>Veneto Institute of Molecular Medicine, via Orus 2, 35129 Padova, Italy

<sup>3</sup>Gastroenterology Unit, Veneto Institute of Oncology IOV-IRCCS, Via Gattamelata 64, 35128 Padova, Italy

<sup>4</sup>Rejuvenate Biomed, Wetenschapspark 13, 3590 Diepenbeek, Belgium

<sup>5</sup>Department of Medicine, McGill University, Montreal, QC H4A 3J1, Canada

Correspondence to: Marco Sandri, Veneto Institute of Molecular Medicine, via Orus 2, 35129 Padova, Italy. Phone: +39 0497923264, Email: [marco.sandri@unipd.it](mailto:marco.sandri@unipd.it) and Evi Mercken, Rejuvenate Biomed, Wetenschapspark 13, 3590 Diepenbeek, Belgium. Email: [evi@rejuvenatebiomed.com](mailto:evi@rejuvenatebiomed.com).

**Supplemental Table 1: Sequences of primers used for Quantitative Real Time Analysis**

|               | Forward                  | Reverse                    |
|---------------|--------------------------|----------------------------|
| GAPDH         | CACCATCTTCCAGGAGCGAG     | CCTTCTCCATGGTGGTGAAGAC     |
| IL-1 $\alpha$ | TCTCCTTCTCCTCCTTCTCC     | GCTCCCTAAGTTCCTGTCA        |
| IL-1 $\beta$  | AAGGAGAACCAAGCAACGACAAAA | TGGGGA ACTCTGCAGACTCAA ACT |
| IL-6          | TAGTCCTTCCTACCCCAATTTC   | TTGGTCCTTAGCCACTCCTTC      |
| LC3           | CACTGCTCTGTCTTGTGTAGGTTG | TCGTTGTGCCTTTATTAGTGCATC   |
| P62           | CCCAGTGTCTTGGCATTCTT     | AGGGAAAGCAGAGGAAGCTC       |

**Supplemental Table 2: Antibodies used in this study**

| <b>Primary antibodies</b>    | <b>Source (Identifier)</b> | <b>Dilution</b> | <b>Analysis</b> |
|------------------------------|----------------------------|-----------------|-----------------|
| Mouse anti-GAPDH             | Abcam (ab8245)             | 1:10000         | WB              |
| Rabbit anti-LC3B             | Sigma (L7543)              | 1:1000          | WB              |
| Rabbit anti-P62              | Sigma (P0067)              | 1:1000          | WB              |
| Rabbit anti-NCAM             | Millipore (AB5032)         | 1:200           | IF              |
| Mouse anti-SV2 supernatant   | Hybridoma Bank             | 1:100           | IF              |
| Mouse anti-2H3 supernatant   | Hybridoma Bank             | 1:50            | IF              |
| Rat anti-LAMP1 (1D4B)        | Hybridoma Bank             | 1:200           | IF              |
| Mouse anti-Pax7              | Hybridoma Bank             | 1:50            | IF              |
| Rabbit anti-Dystrophin       | Abcam (ab85302)            | 1:200           | IF              |
| Mouse anti-MHC IIB (BF-F3)   | Hybridoma Bank             | 1:50            | IF              |
| Mouse anti-MHC IIA (sc-71)   | Hybridoma Bank             | 1:100           | IF              |
| Mouse anti-MHC I (BA-D5)     | Hybridoma Bank             | 1:50            | IF              |
| Bungarotoxyn, 594 conjugated | Invitrogen (b13423)        | 1:200           | IF              |
| WGA, 488 conjugated          | Invitrogen (11570806)      | 1:100           | IF              |

WB: western blotting; IF: immunofluorescence

| <b>Secondary antibodies</b>                           | <b>Source (Identifier)</b> | <b>Dilution</b> | <b>Analysis</b> |
|-------------------------------------------------------|----------------------------|-----------------|-----------------|
| Goat Anti-Mouse IgG (H + L)-HRP Conjugate (for GAPDH) | Biorad (1706516)           | 1:20000         | WB              |

|                                                                                          |                                             |        |    |
|------------------------------------------------------------------------------------------|---------------------------------------------|--------|----|
| Goat Anti-Rabbit IgG (H + L)-HRP Conjugate (for LC3/P62)                                 | Biorad (1706515)                            | 1:2000 | WB |
| Cy3 anti-rabbit IgG (for NCAM)                                                           | Jackson (111-165-003)                       | 1:200  | IF |
| Goat anti-Mouse IgG (H+L), Superclonal™ Recombinant, Alexa Fluor™ 488 (for SV2/2H3)      | Invitrogen (A28175)                         | 1:200  | IF |
| Goat anti-Rat IgG (H+L) Cross-Adsorbed, Alexa Fluor™ 594 (for LAMP1)                     | Invitrogen (A-11007)                        | 1:200  | IF |
| Goat anti-Mouse IgG (H+L) Cross-Adsorbed Secondary Antibody, Alexa Fluor™ 594 (for Pax7) | Invitrogen (A-11005)                        | 1:200  | IF |
| Alexa fluor 488 anti-rabbit (for dystrophin in the Pax7 immunostaining)                  | Jackson (111-145-144)                       | 1:200  | IF |
| Alexa Fluor 405 goat anti-mouse IgG2b (MHC I)                                            | Jackson ImmunoResearch Europe (115-475-207) | 1:200  | IF |
| Alexa Fluor 448 goat anti-mouse IgG1 (MHC IIa)                                           | Jackson ImmunoResearch Europe (115-545-205) | 1:200  | IF |
| Alexa Fluor 594 goat anti-mouse IgM (Cy3) (MHC IIb)                                      | Jackson ImmunoResearch Europe (115-505-020) | 1:200  | IF |
| Alexa Fluor 647 goat anti-rabbit IgG (dystrophin)                                        | Jackson ImmunoResearch Europe (111-607-003) | 1:200  | IF |

**Supplemental Table 3: Significant synergy between metformin and galantamine was detected in terms of adult *C. elegans* survival**

| <b>Condition</b>  | <b>[Met]<br/>(mM)</b> | <b>[Gal]<br/>(<math>\mu</math>M)</b> | <b>Mean lifespan vs<br/>untreated control</b> | <b>Mean lifespan vs<br/>Met 25 + Gal 100</b> |
|-------------------|-----------------------|--------------------------------------|-----------------------------------------------|----------------------------------------------|
| Untreated control | 0                     | 0                                    |                                               | -18.1%***                                    |
| Met 25            | 25                    | 0                                    | +11.9%***                                     | -8.3%*                                       |
| Gal 100           | 0                     | 100                                  | +6.8%*                                        | -12.5%***                                    |
| Met 25 + Gal 100  | 25                    | 100                                  | +22.1%***                                     |                                              |

Met: metformin; Gal: galantamine; \* $p_{\log\text{-rank}} < 0.05$ , \*\*\* $p_{\log\text{-rank}} < 0.001$ .

**A**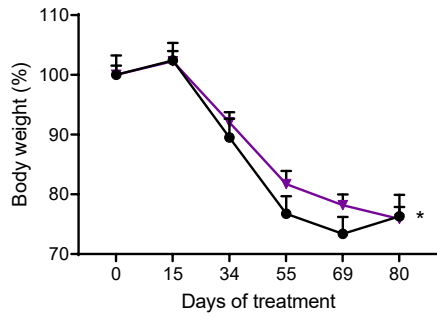**B**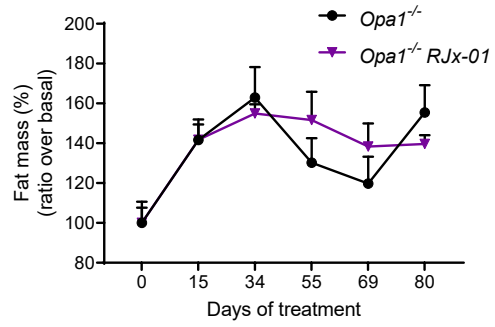**C**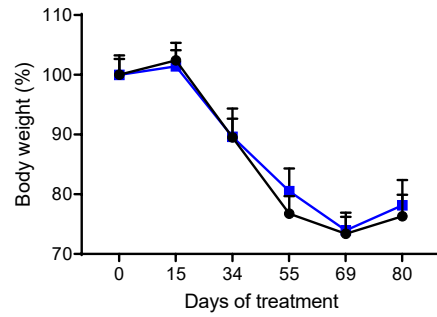**D**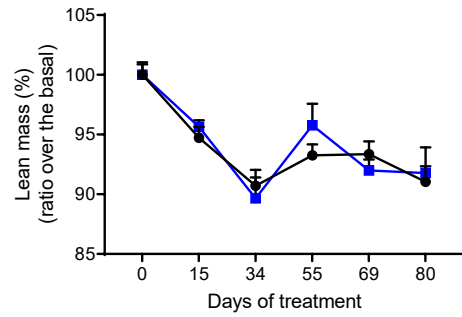**E**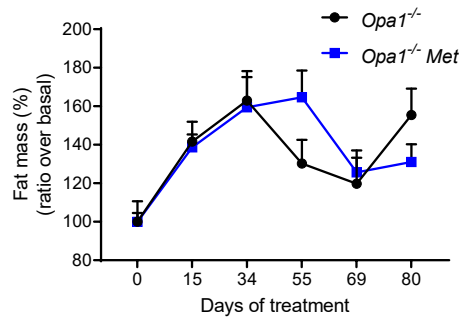**F**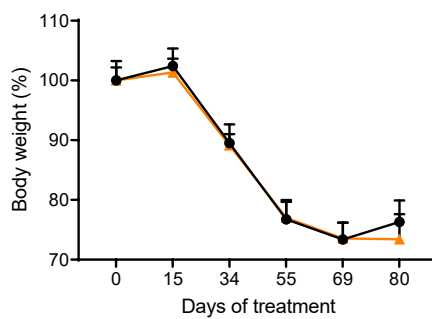**G**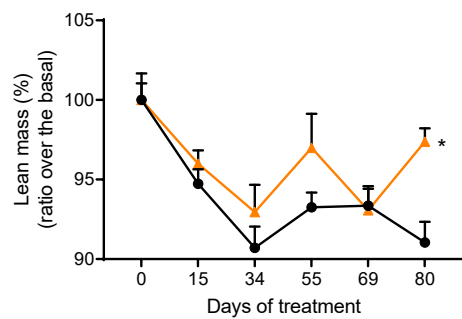**H**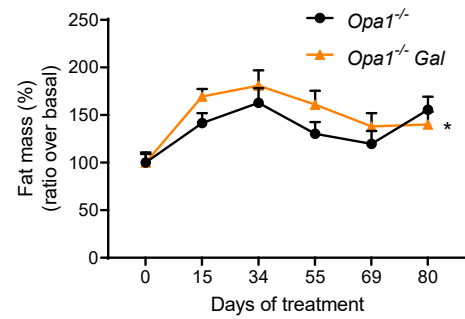

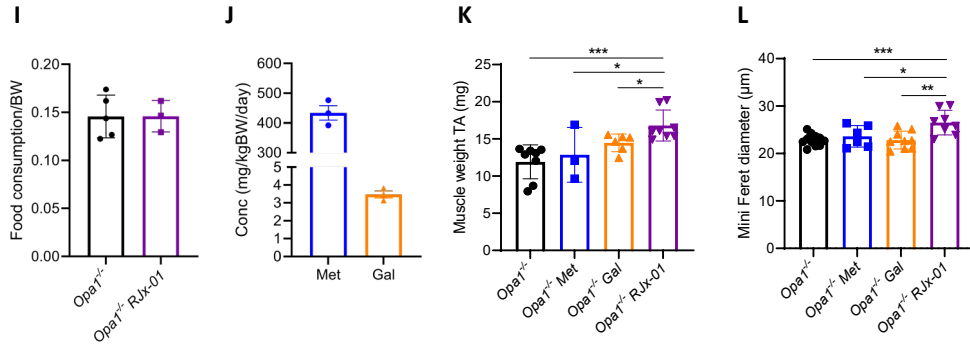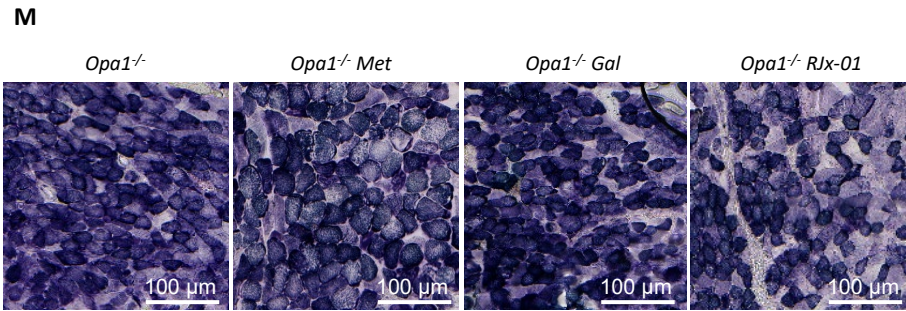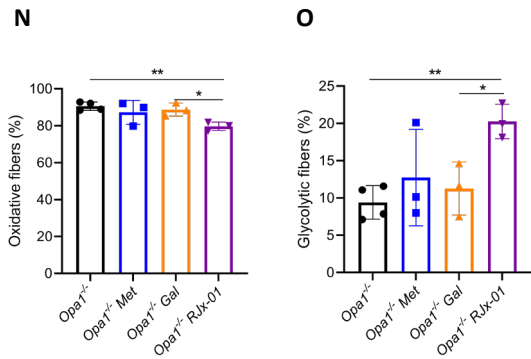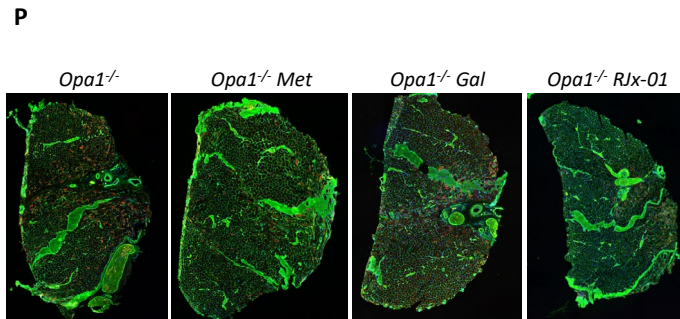

**Figure S1. (A-B)** Percentage of body weight and fat mass of *Opal<sup>-/-</sup>* mice fed a diet supplemented with RJx-01. (*Opal<sup>-/-</sup>*: n=11, *Opal<sup>-/-</sup> RJx-01*: n=8). **(C-H)** Percentage of body weight, lean mass and fat mass of *Opal<sup>-/-</sup>* mice fed a diet supplemented with metformin (*Opal<sup>-/-</sup>*: n=11, *Opal<sup>-/-</sup> Met*: n=6) or **(F-H)** galantamine (*Opal<sup>-/-</sup>*: n=11, *Opal<sup>-/-</sup> Gal*: n=6). **(I)** Food consumption over bodyweight and **(J)** dosages of metformin and galantamine per kg of bodyweight (*Opal<sup>-/-</sup>*: n=5, *Opal<sup>-/-</sup> RJx-01*: n=3) **(K)** Weights of tibialis anterior muscles (TA) (*Opal<sup>-/-</sup>*: n=8, *Opal<sup>-/-</sup> Met*: n=3, *Opal<sup>-/-</sup> Gal*: n=6, *Opal<sup>-/-</sup> RJx-01*: n=8) and **(L)** minimal Feret diameter of transversal gastrocnemius sections (*Opal<sup>-/-</sup>*: n=11, *Opal<sup>-/-</sup> Met*: n=6, *Opal<sup>-/-</sup> Gal*: n=9, *Opal<sup>-/-</sup> RJx-01*: n=8) **(M)** SDH staining (Scale bar = 100  $\mu$ m) and quantification of the number of **(N)** Oxidative, and **(O)** Glycolytic fibers in the different conditions (*Opal<sup>-/-</sup>*: n=4, *Opal<sup>-/-</sup> Met*: n=3, *Opal<sup>-/-</sup> Gal*: n=3, *Opal<sup>-/-</sup> RJx-01*: n=3). **(P)** Representative muscles stained with NCAM and WGA. Data are mean  $\pm$  SEM. \* $P < 0.05$ , \*\* $P < 0.01$ , \*\*\* $P < 0.001$ . In panel **A, B, C, D, E, F, G** and **H** a linear mixed-effects model was used, a two-tailed Student's *t* test was performed in panel **I** and **J**, and 1-way ANOVA followed by Holm step-down method (two-tailed Student's *t* test) was performed in panels **O** and **P**.



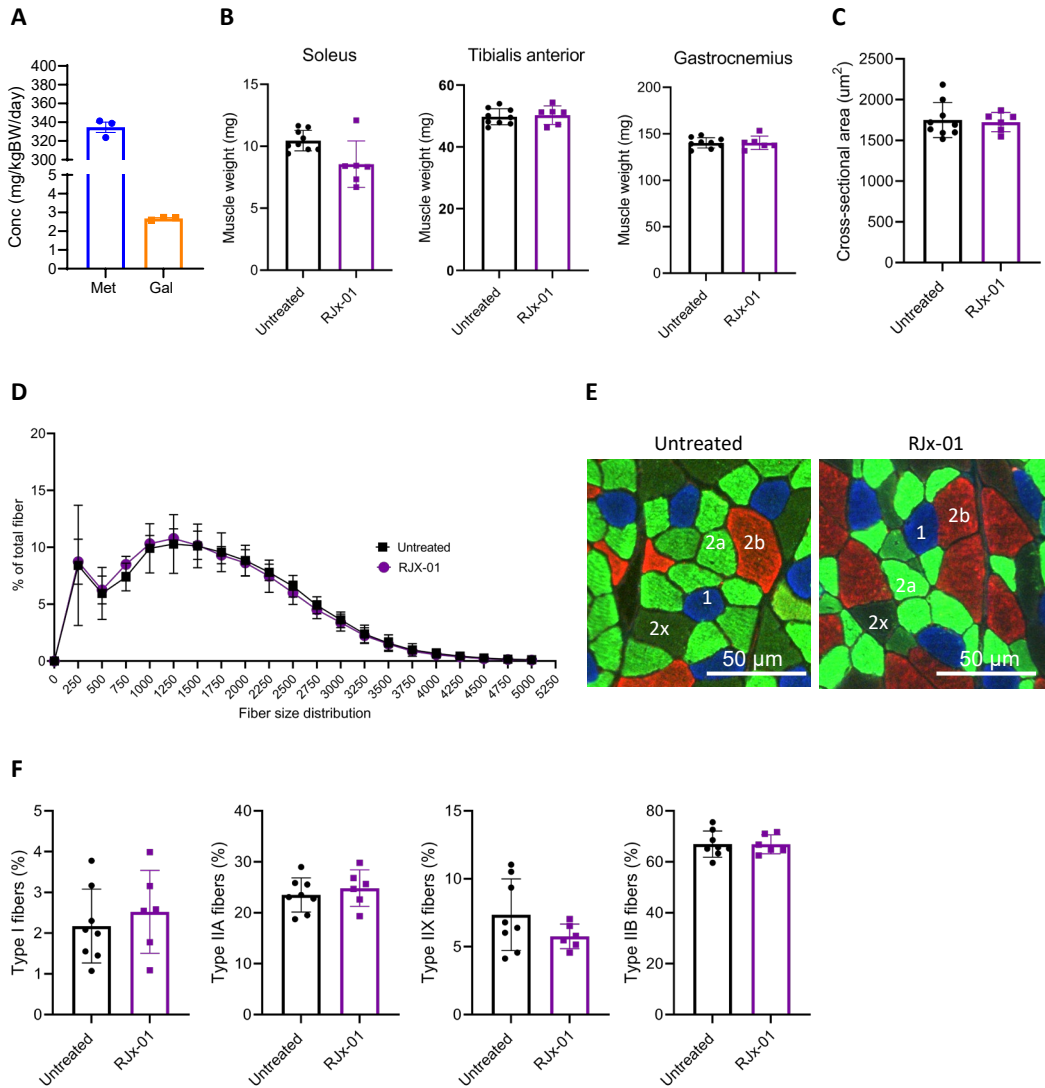

**Figure S2.** (A) Dosages of metformin (Met) and galantamine (Gal) per kg of bodyweight in aged mice (n=3). (B) Weights of muscles (soleus, tibialis anterior, gastrocnemius) of aged mice fed a control diet or a control diet supplemented with RJx-01. (C) Myofibers cross-sectional area analysis of gastrocnemius muscle, and (D) the relative fiber size distribution. (E) Representative images of the fiber type staining (Scale bar = 50 um) and (F) The number of fibers (Type I, IIA, IIX, IIB) expressed as a percentage (n= 5300-7500 fibers per muscle). (Untreated: n=9; RJx-01: n=6). Data are mean  $\pm$  SEM.

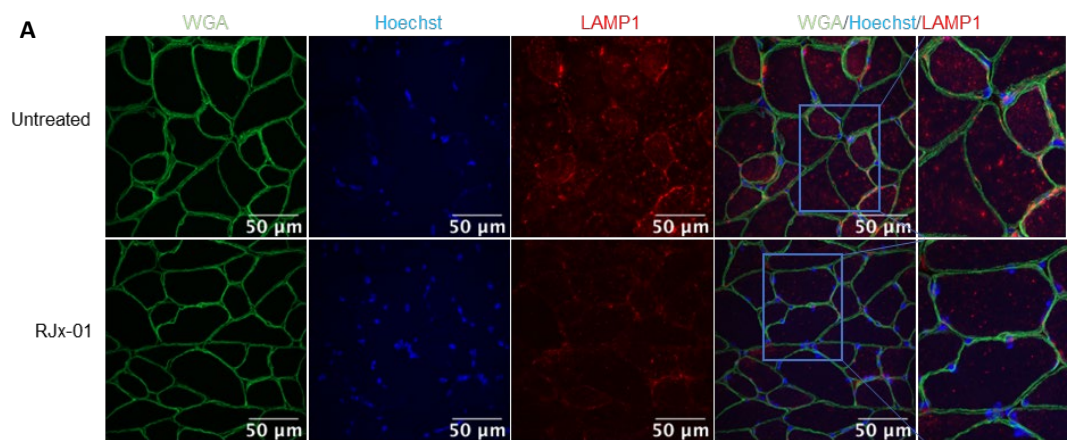

**Figure S3. (A)** Representative images of LAMP1 expression after 18 weeks of treatment. (Untreated: n=3; RJx-01: n=6). Scale bar = 50  $\mu$ m.
